# Supplementary material
Source: publisher site journal article supplement (http://spandidos-publications.com/6263/downloadSupplementary)
Supplement: Supplementary file 1 [file downloadSupplementary]

Table S1. Scoring general condition of mice.

| Observation indicators     | Score – Description                                                                                                                                                                                                                                                                                                                                         |
|----------------------------|-------------------------------------------------------------------------------------------------------------------------------------------------------------------------------------------------------------------------------------------------------------------------------------------------------------------------------------------------------------|
| Appearance                 | 0 – Shiny and smooth hairs<br>1 – Some hairs erect<br>2 – All hairs on the back erect<br>3 – Fluffy and messy hairs<br>4 – Haggard                                                                                                                                                                                                                          |
| Activity                   | 0 – Active<br>1 – Active and not upright<br>2 – Less active, sluggish but still able to walk<br>3 – Active after provocation and tremulous<br>4 – Inactive after provocation                                                                                                                                                                                |
| Autonomic activities       | 0 – Normal (feeding, drinking, climbing, walking, fighting, etc.)<br>1 – Reduced activity with movement only at the bottom of the cage<br>2 – Markedly reduced activity with stillness and occasional exploratory activity<br>3 – Standing still<br>4 – Standing still and tremulous (especially the hind limb)                                             |
| Response to stimuli        | 0 – Responsive<br>1 – Slow or no response to sounds but quick response to touch (flee immediately)<br>2 – No response to sounds and common response to touch (take a few steps)<br>3 – No response to sounds and slow response to touch (stand still)<br>4 – No response to sounds and almost no response to touch (unable to turn over after being pushed) |
| Eye closure and secretions | 0 – Fully open<br>1 – Not fully open with possible discharge<br>2 – Half open with possible discharge<br>3 – Not fully closed with possible discharge<br>4 – Fully closed or with significant discharge (cloudy)                                                                                                                                            |
| Respiratory rate           | 0 – Normal<br>1 – Slight reduction (can't be counted with the naked eyes)<br>2 – Moderate reduction (can barely be counted with the naked eyes)<br>3 – Significant reduction (can easily be counted with the naked eyes with a breathing interval of 0.5 sec)<br>4 – Extreme reduction (breathing intervals > 1 sec)                                        |
| Respiratory quality        | 0 – Normal<br>1 – Intermittent dyspnea<br>2 – Dyspnea without panting<br>3 – Dyspnea with intermittent panting<br>4 – Panting                                                                                                                                                                                                                               |

Table SII. Mean weight of surviving embryo.

| Group   | N  | Mean embryo weight, g            | F      | P       |
|---------|----|----------------------------------|--------|---------|
| Control | 13 | 0.0267±0.0019                    |        |         |
| Model   | 5  | 0.0174±0.0008 <sup>a</sup>       |        |         |
| QUE     | 13 | 0.0258±0.0025 <sup>c</sup>       | 24.572 | <0.0001 |
| LDQ     | 11 | 0.0200±0.0027 <sup>a, e</sup>    |        |         |
| MDQ     | 6  | 0.0205±0.0023 <sup>a, f</sup>    |        |         |
| HDQ     | 8  | 0.0218±0.0014 <sup>b, d, f</sup> |        |         |

<sup>a</sup>P<0.0001 and <sup>b</sup>P<0.001 vs. Control group; <sup>c</sup>P<0.0001 and <sup>d</sup>P<0.05 vs. the Model; <sup>e</sup>P<0.0001 and <sup>f</sup>P<0.01 vs. the QUE group. Control, the control group; HDQ, high-dose quercetin; LDQ, the low-dose quercetin group; MDQ, the medium-dose quercetin; QUE, the quercetin + PBS group.

Table SIII. The litter size and birthweight of the pups.

| Group    | N | Littersize /n | Birthweight of the pups /g | Mean birthweight of the pups /g |
|----------|---|---------------|----------------------------|---------------------------------|
| Control  | 3 | 12.00±1.00    | 19.47±1.01                 | 1.63±0.05                       |
| Model    | 3 | 11.67±3.06    | 20.23±4.03                 | 1.75±0.14                       |
| QUE      | 3 | 13.33±1.53    | 23.17±1.85                 | 1.75±0.16                       |
| LDQ      | 3 | 14.00±1.73    | 23.83±2.20                 | 1.71±0.06                       |
| MDQ      | 3 | 12.00±0.00    | 19.83±0.31                 | 1.65±0.03                       |
| HDQ      | 3 | 12.33±1.53    | 19.57±2.39                 | 1.59±0.04                       |
| <i>F</i> | - | 0.830         | 2.195                      | 1.538                           |
| <i>P</i> | - | 0.553         | 0.123                      | 0.250                           |

HDQ, high-dose quercetin group; LDQ, the low-dose quercetin group; MDQ, the medium-dose quercetin group; Model, the model group; QUE, the quercetin + PBS group.

Table SIV. Targets having higher degree value than the average value.

| Gene     | Protein Name                                                  | Degree |
|----------|---------------------------------------------------------------|--------|
| ALB      | Albumin                                                       | 61     |
| AKT1     | RAC-alpha serine/threonine-protein kinase                     | 48     |
| CASP3    | Caspase-3                                                     | 42     |
| MMP9     | Matrix metalloproteinase-9                                    | 38     |
| IGF1     | Insulin-like growth factor I                                  | 37     |
| HRAS     | GTPase HRas                                                   | 36     |
| HSP90AA1 | Heat shock protein HSP 90-alpha                               | 36     |
| ESR1     | Estrogen receptor                                             | 32     |
| PPARG    | Peroxisome proliferator-activated receptor gamma              | 31     |
| NOS3     | Nitric oxide synthase, endothelial                            | 26     |
| KDR      | Vascular endothelial growth factor receptor 2                 | 26     |
| MAPK14   | Mitogen-activated protein kinase 14                           | 25     |
| IL2      | Interleukin-2                                                 | 24     |
| STAT1    | Signal transducer and activator of transcription 1-alpha/beta | 23     |
| CCL5     | C-C motif chemokine 5                                         | 21     |
| F2       | Prothrombin                                                   | 21     |
| JAK2     | Tyrosine-protein kinase JAK2                                  | 21     |
| PGR      | Progesterone receptor                                         | 20     |
| KIT      | Mast/stem cell growth factor receptor Kit                     | 20     |
| ACE      | Angiotensin-converting enzyme                                 | 19     |
| AR       | Androgen receptor                                             | 19     |
| NOS2     | Nitric oxide synthase, inducible                              | 18     |
| SELE     | E-selectin                                                    | 18     |
| REN      | Renin                                                         | 18     |
| LGALS3   | Galectin-3                                                    | 18     |
| CDC42    | Cell division control protein 42 homolog                      | 18     |
| SOD2     | Superoxide dismutase [Mn], mitochondrial                      | 17     |
| CTSB     | Cathepsin B                                                   | 17     |
| SELP     | P-selectin                                                    | 17     |
| PARP1    | Poly [ADP-ribose] polymerase 1                                | 17     |
| MMP3     | Stromelysin-1                                                 | 16     |
| CASP1    | Caspase-1                                                     | 15     |
| PLAU     | Urokinase-type plasminogen activator                          | 15     |
| XIAP     | X-linked inhibitor of apoptosis protein                       | 15     |

Table SV. Relative mRNA expression of AKT1, ESR1, JAK2, MAPK1, MAPK3, PGR, PI3K and SGK1.

| Group   | AKT1                   | ESR1                   | JAK2                   | MAPK1                  | MAPK3                  | PGR                    | PI3K                   | SGK1                      |
|---------|------------------------|------------------------|------------------------|------------------------|------------------------|------------------------|------------------------|---------------------------|
| Control | 1.09±0.08              | 0.74±0.11              | 1.02±0.11              | 1.04±0.04              | 0.92±0.09              | 1.23±0.07              | 1.37±0.34              | 1.11±0.15                 |
| Model   | 0.69±0.03 <sup>d</sup> | 1.15±0.15 <sup>a</sup> | 1.16±0.21              | 0.63±0.06 <sup>a</sup> | 1.52±0.20 <sup>c</sup> | 0.57±0.06 <sup>c</sup> | 0.99±0.24              | 0.40±0.03 <sup>b</sup>    |
| QUE     | 1.02±0.09 <sup>g</sup> | 0.70±0.04 <sup>f</sup> | 1.11±0.03              | 1.11±0.12 <sup>e</sup> | 0.99±0.12 <sup>f</sup> | 1.05±0.14 <sup>f</sup> | 1.16±0.07              | 1.19±0.12 <sup>g</sup>    |
| LDQ     | 1.04±0.09 <sup>g</sup> | 1.01±0.21              | 1.49±0.07 <sup>a</sup> | 0.98±0.07 <sup>e</sup> | 1.01±0.09 <sup>f</sup> | 1.55±0.14 <sup>h</sup> | 1.67±0.18              | 1.41±0.14 <sup>h</sup>    |
| MDQ     | 1.18±0.01 <sup>h</sup> | 1.08±0.06 <sup>a</sup> | 1.23±0.22              | 1.22±0.05 <sup>f</sup> | 1.10±0.08 <sup>f</sup> | 1.51±0.19 <sup>h</sup> | 1.99±0.27 <sup>f</sup> | 1.68±0.25 <sup>b, h</sup> |
| HDQ     | 0.86±0.05 <sup>b</sup> | 0.84±0.05              | 1.14±0.07              | 1.19±0.24 <sup>f</sup> | 0.85±0.08 <sup>g</sup> | 0.94±0.04 <sup>e</sup> | 1.44±0.31              | 1.63±0.02 <sup>b, h</sup> |

<sup>a</sup>P<0.05, <sup>b</sup>P<0.01, <sup>c</sup>P<0.001 and <sup>d</sup>P<0.0001 vs. Control group; <sup>e</sup>P<0.05, <sup>f</sup>P<0.01, <sup>g</sup>P<0.001 and <sup>h</sup>P<0.0001 vs. the Model group. ESR, estrogen receptor; MAPK, mitogen-activated protein kinase; PGR, progesterone receptor; PI3K, phosphatidylinositol 3-kinase; SGK1, serum- and glucocorticoid-inducible kinase 1; HDQ, the high-dose quercetin group; LDQ, low-dose quercetin group; MDQ, the medium-dose quercetin group; Model, the model group; QUE, the quercetin + PBS.
